# Supplementary material
Source: PubMed Central journal article supplement (PMC5971611)
Supplement: AAC.02629-17_zac006187192s1.pdf [file AAC.02629-17_zac006187192s1.pdf]

1 **Supplemental material**

2 **Table S1.** Primers and probes used for RT-qPCR assays in this study.

| <b>Gene/ORF</b>      | <b>Primer name</b> | <b>Sequence (5' → 3')</b> | <b>Tm (°C)</b> | <b>Amplicon size (bp)</b> |
|----------------------|--------------------|---------------------------|----------------|---------------------------|
| <i>crpP</i>          | OD1-RT             | GCTGGACAGACGACACTTCAA     | 57             | 114                       |
|                      | OR2-RT             | CGCATCGCAGGATGACTGTAG     | 58             |                           |
|                      | P-RT123            | CCACCGGACTGTACGGGCTATTG   | 61             |                           |
| 16S RNA <sup>a</sup> | OD-P16S            | TCGAAGCAACGCGAAGAAC       | 53             | 72                        |
|                      | OR-P16S            | CGAAGGCACCAATCCATCTCT     | 52             |                           |
|                      | P-P16S             | TACCTGGCCTTGACATGCTGAGA   | 52             |                           |
| 16S RNA <sup>b</sup> | OD-E16S            | TCGATGCAACGCGAAGAAC       | 53             | 72                        |
|                      | OR-E16S            | CGAAGGCACCAATCCATCTCT     | 52             |                           |
|                      | P-E16S             | TACCTGGTCTTGACATCCACAGAAC | 58             |                           |

3 a and b, primers and probe used to 16S RNA analysis expression from *P. aeruginosa* or *E. coli*,  
 4 respectively.

5

6

7

8

9

10  
11  
12  
13  
14  
15  
16  
17  
18  
19  
20  
21  
22  
23  
24  
25  
26  
27  
28  
29

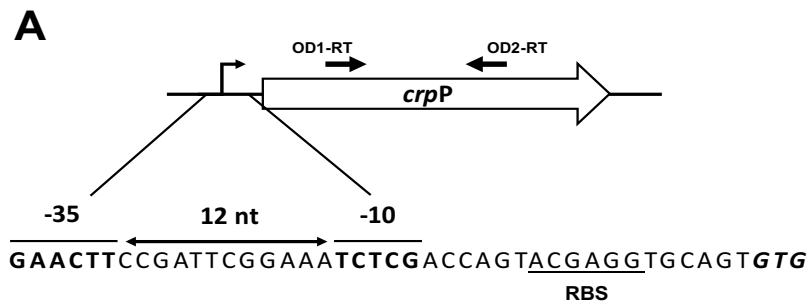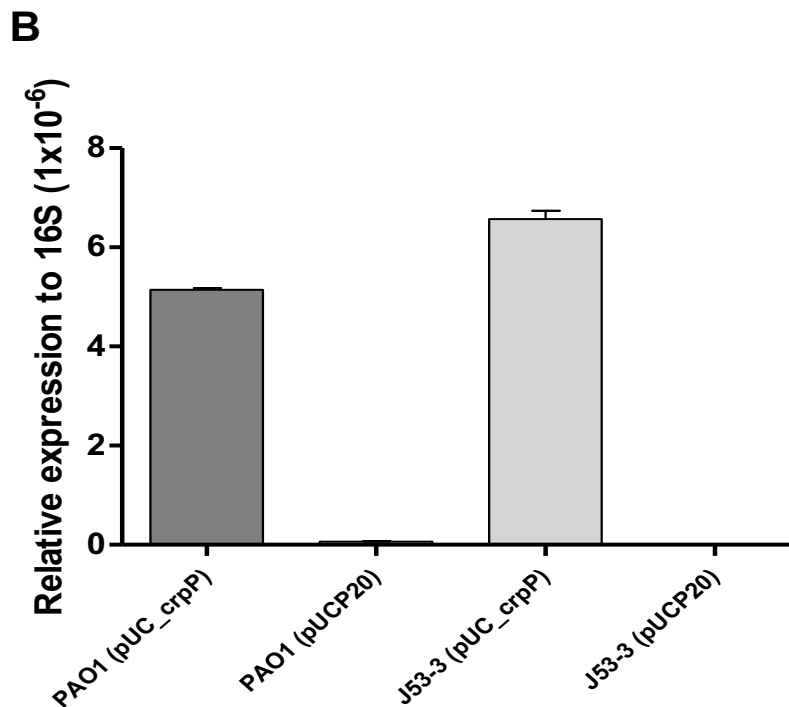

30 **Figure S1. Analysis of functionality of the putative *crpP* promoter.** **A)** The  
31 coding region of the *crpP* gene is depicted with an open arrow indicating transcription  
32 direction. Black arrows show positions of the oligonucleotides for RT-qPCR assays  
33 described in the text. Location of the possible promoter is indicated by ( $P$ ). The  
34 nucleotides (nt) sequence of the putative promoter is showed. The ribosome binding  
35 site (RBS) and the nt that encodes to the initial codon of the protein (bold and italics)  
36 are indicated. **B)** Expression levels of *crpP* from cultures of *P. aeruginosa* PAO1 or  
37 *E. coli* strains with or without the pUC-*crpP* plasmid determined by RT-qPCR. Values  
38 represent the means of two independent determinations in duplicate normalized with  
39 respect to transcription of the *16S* gene from *P. aeruginosa* or *E. coli*, respectively.

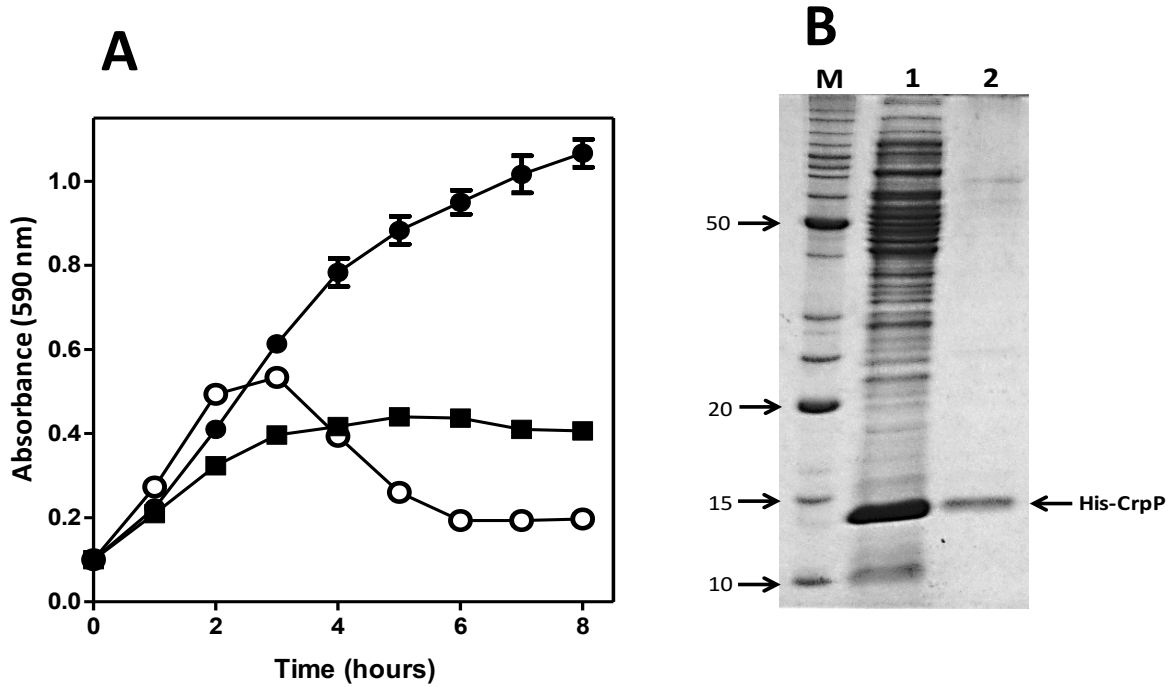

41

42 **Figure S2. Role of His-CrpP in *E. coli* BL21 susceptibility to CIP. A)** Growth of the *E.*  
 43 *coli* BL21 (pTrcHis-crpP) strain under IPTG-induced (0.5 mM) (●, ■) or non-induced (○)  
 44 conditions, in the presence (○, ■) or absence (●) of CIP (0.2 μg/mL). The data shown  
 45 represent the mean and standard error (SE) of four independent duplicate assays. **B)** SDS-  
 46 PAGE analysis of overexpression and purification of His-CrpP from the *E. coli*  
 47 BL21(pTrcHis-crpP) strain. Lane 1, lysate from cells induced with 0.5 mM IPTG; 2,  
 48 purification of His-CrpP. M, Molecular mass markers are shown on the left (in kDa).

49

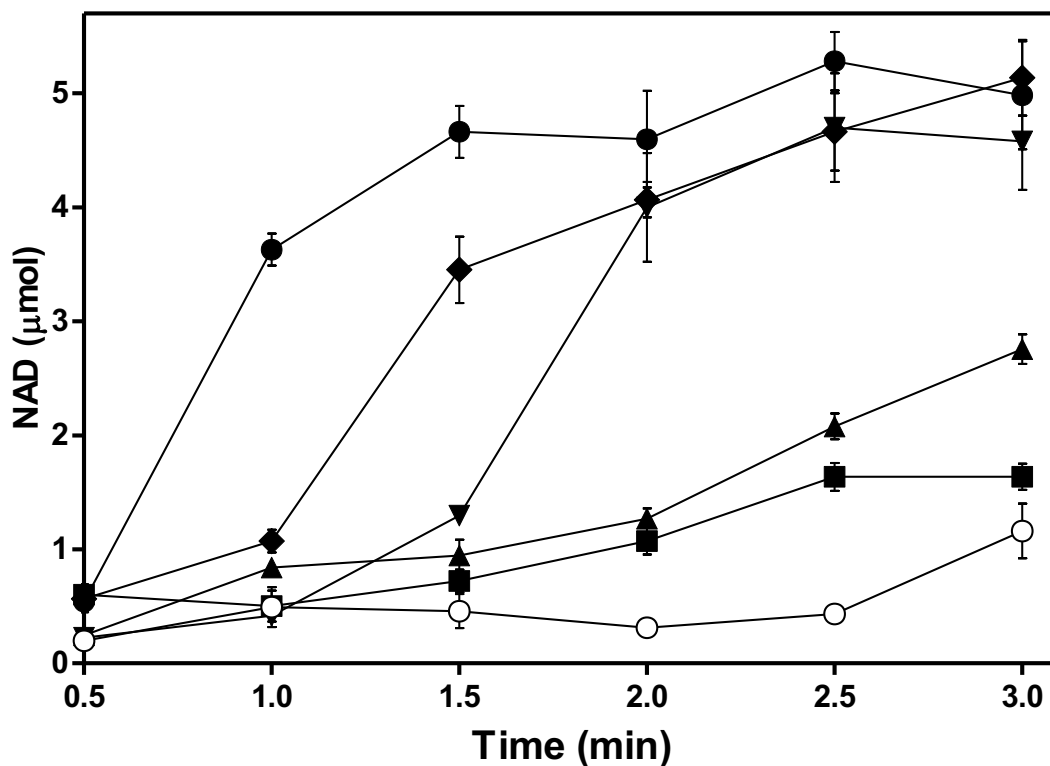

51

52

53 **Figure S3. Comparison of the NADH-oxidation rate of native or denatured His-CrpP.**

54 NADH oxidation was measured in a reaction mix containing 2.0 mM CIP in the presence of

55 1.0 (■), 2.5 (▲), 5.0 (▼), 7.5 (◆), or 10 (●) μg/mL native or (○) 10 μg/mL denatured His-

56 CrpP protein, as described in the Materials and Methods. The data shown represent the

57 means and SEs of four independent duplicate assays.

58

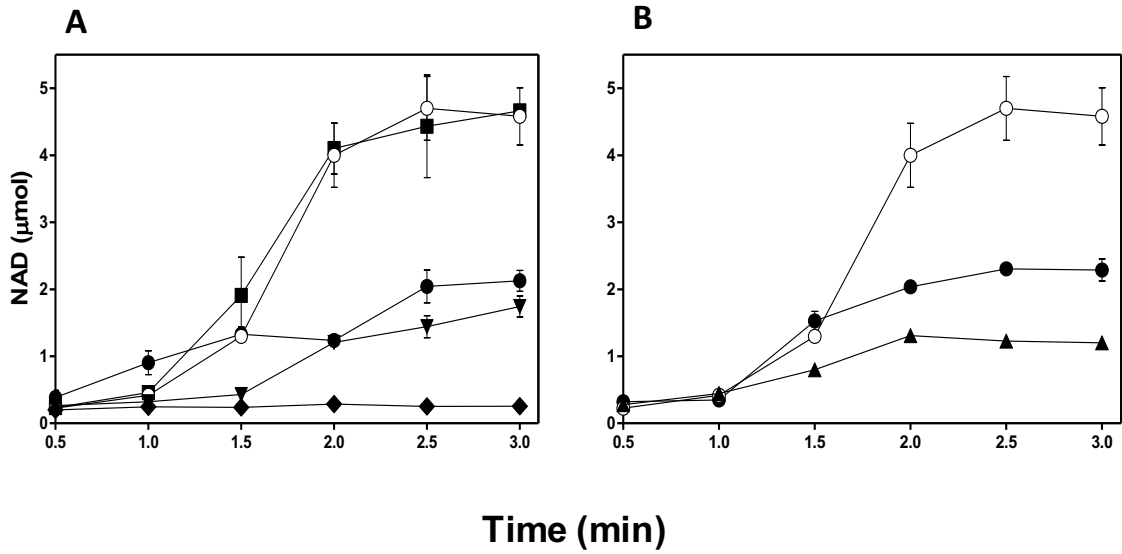

60

61 **Figure S4. Effect of pH and Mg<sup>2+</sup> on His-CrpP activity.** CIP (2.0 mM) was incubated in  
 62 the presence of 5.0 µg/mL of His-CrpP protein at different pH levels or MgCl<sub>2</sub> concentrations,  
 63 at 37°C for 15 min. NADH oxidation was measured spectrophotometrically at 390 nm, as  
 64 described in the Materials and Methods section. **A)** Effect of pH on the NADH-oxidation rate.  
 65 pH values are indicated with symbols: (●), 6.0; (■), 6.5; (○), 7.0 (▼), 7.5, and (◆), 8.0. **B)**  
 66 Effect of the MgCl<sub>2</sub> concentration on the NADH-oxidation rate. MgCl<sub>2</sub> concentrations are  
 67 indicated with symbols: (●), 5.0; (○), 10 or (▲), 15 mM. The data shown represent the mean  
 68 and SEs of four independent duplicate assays.

69

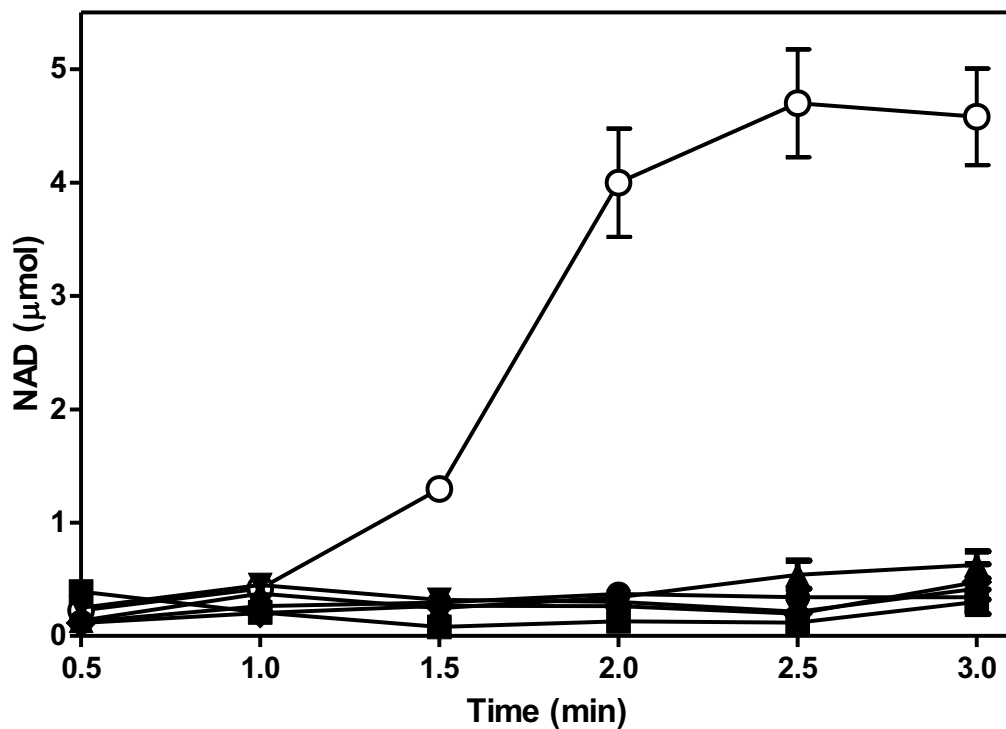

71

72 **Figure S5. NADH-oxidation rate comparisons by His-CrpP on quinolones and**  
 73 **aminoglycosides.** NADH oxidation was measured in reaction mixtures containing 1 mM of  
 74 each antibiotic in the presence of 5.0  $\mu\text{g/mL}$  His-CrpP protein, as described in the Materials  
 75 and Methods section. Symbols: ( $\circ$ ), CIP; ( $\blacktriangle$ ), LVX; ( $\blacktriangledown$ ), MXF; ( $\bullet$ ), NAL; ( $\blacksquare$ ), KAN and ( $\blacklozenge$ ),  
 76 STR. The data shown represent the mean and SEs of four independent duplicate assays.

77

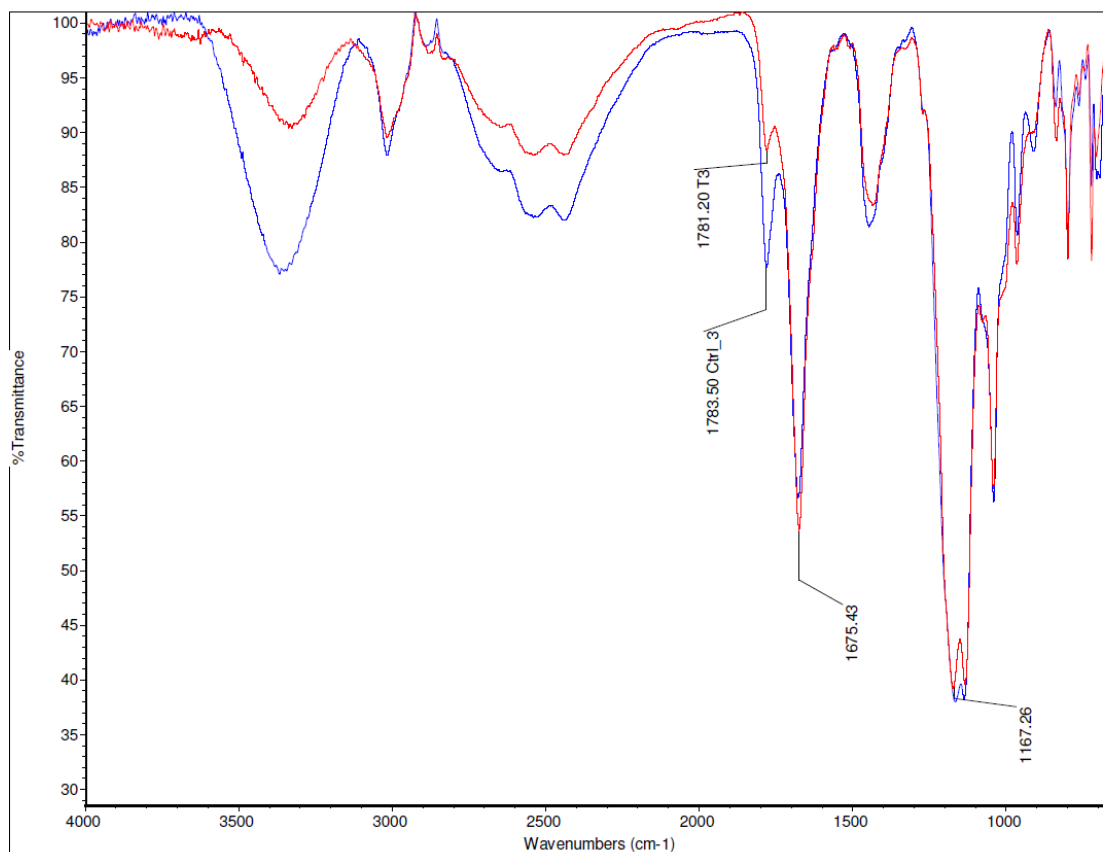

78

79

80 **Figure S6. Infrared spectroscopy analysis of the modification of CIP by His-CrpP.**

81 Representative spectroscopy analysis of CIP after its incubation in the presence (red) or  
82 absence (blue) of 5.0  $\mu\text{g}/\text{mL}$  His-CrpP protein in a reaction mixture containing 2.0 mM Mg-  
83 ATP, as described in the Materials and Methods section.

84

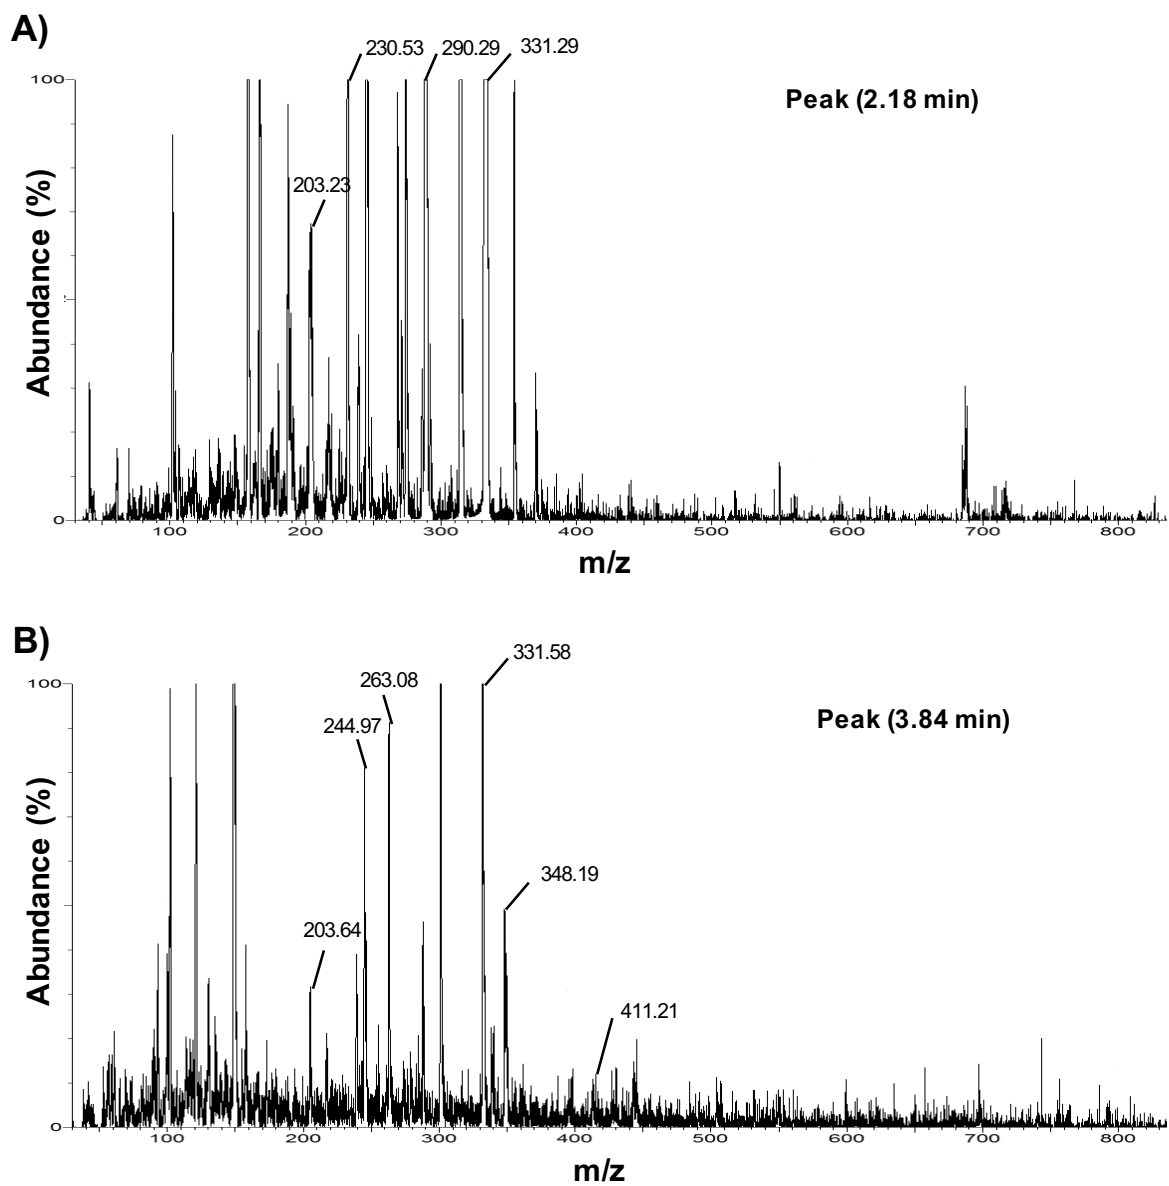

86

87 **Figure S7. Fragment ion spectra of the retention pikes in LC-MS/MS metabolite**  
88 **analysis (CIP modification by His-CrpP). CIP inactivation by His-CrpP; representative**  
89 **mass-fragmentation profile corresponding to peaks with retention times of 2.18 (A) and 3.84**  
90 **(B) min.**

91

92
